# Supplementary material
Source: PubMed Central journal article supplement (PMC3280906)

# Figure S1

## A

### HIF-1 $\alpha$ -dependent Induction of miR-155 in MCF7 Cells

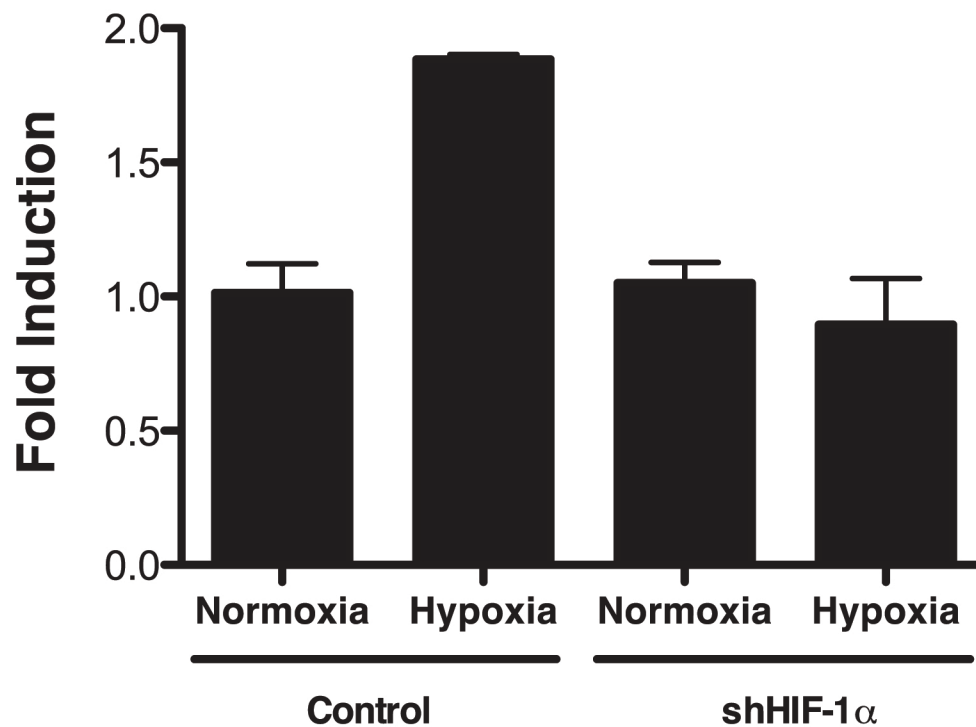

## B

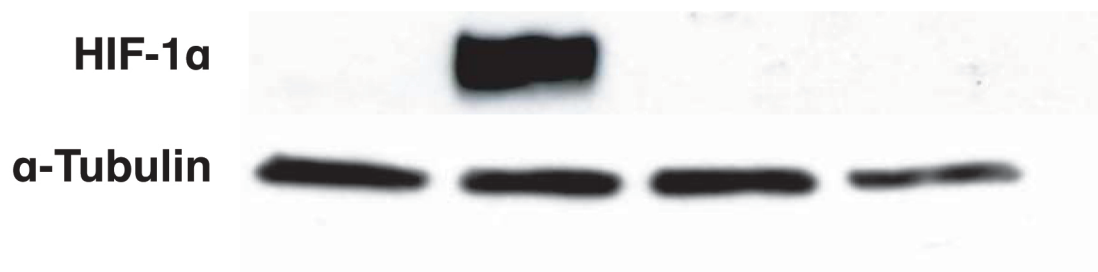

Supplement: cbt-12-908-s1.pdf [file cbt-12-908-s1.pdf]
